# Supplementary material
Source: PubMed Central journal article supplement (PMC8988022)
Supplement: jamacardiol-e220386-s003.pdf [file jamacardiol-e220386-s003.pdf]

## **Data Sharing Statement**

Svensson. TET2-Driven Clonal Hematopoiesis and Response to Canakinumab. *JAMA Cardiol.*  
Published April 06, 2022. doi:10.1001/jamacardio.2022.0386

### **Data**

**Data available:** No
